# Supplementary material for: One-pot synthesis of monodispersed ZnS nanospheres with high antibacterial activity
Source: Royal Society of Chemistry journal article supplement (doi:10.1039/c0jm01776k), 2010-01-01
Supplement: c0jm01776k.pdf [file c0jm01776k.pdf]

## ***Supplementary Information***

### **One-pot synthesis of monodispersed ZnS nanospheres with high antibacterial activity**

Gaiping Li,<sup>a,b</sup> Junfeng Zhai,<sup>a,b</sup> Dan Li,<sup>a</sup> Xiaona Fang,<sup>c</sup> Hong Jiang,<sup>a</sup> Qingzhe Dong,<sup>a</sup>  
and Erkang Wang<sup>\*a</sup>

<sup>a</sup>*State Key Laboratory of Electroanalytical Chemistry, Changchun Institute of Applied Chemistry, Chinese Academy of Sciences, Changchun, Jilin 130022, P. R. China*

<sup>b</sup>*Graduate School of the Chinese Academy of Sciences, Beijing 100039, P. R. China*

<sup>c</sup>*College of Physics, Jilin University, Changchun 130012, P. R. China*

Corresponding author. Tel.: +86-431-85262003; fax: +86-431-85689711.

*E-mail address:* ekwang@ciac.jl.cn (E. Wang).

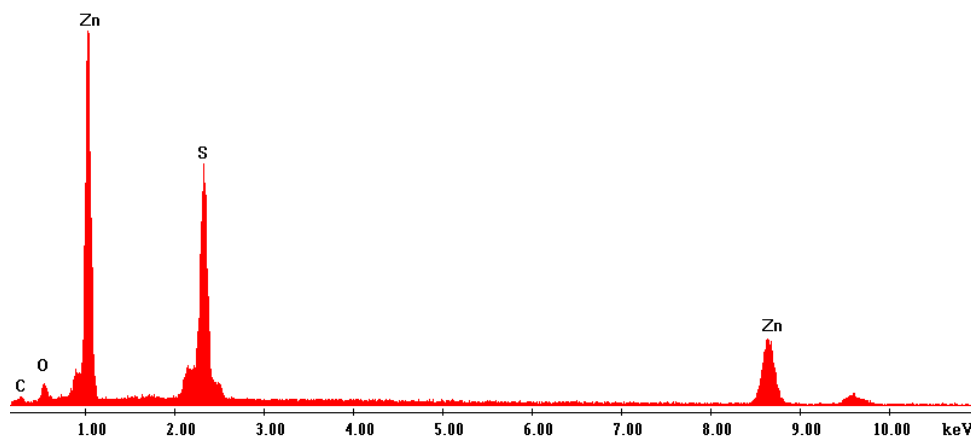

**Fig. S1** The Energy dispersive spectrometry (EDS) spectrum of ZnS NSs.

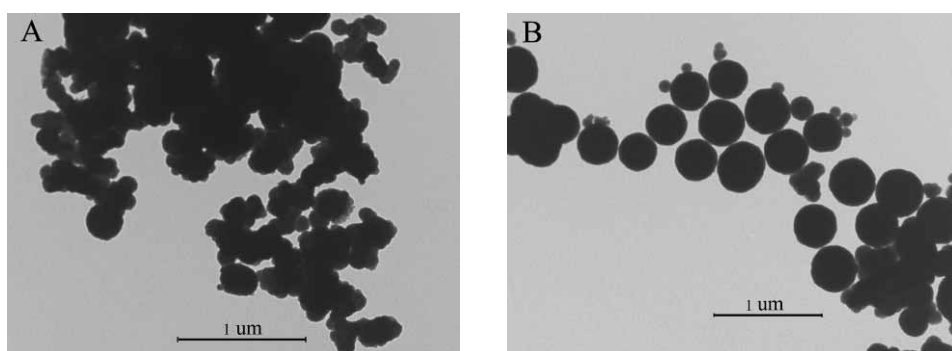

**Fig. S2:** The TEM images of ZnS synthesized without FC-DDAB (A) and with DDAB (B).

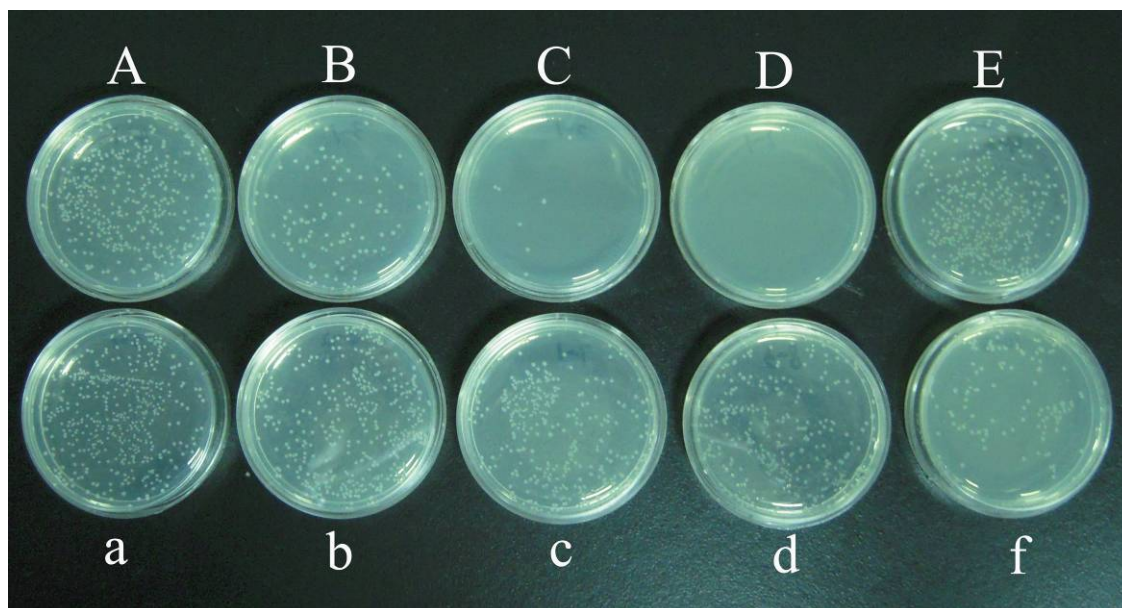

**Fig. S3:** Photographs of colonies of *E. coli* on agar plates incubated with different concentrations of ZnS NSs (A: 0.03; B: 0.06; C: 0.12; D: 0.25; E: 0 mg/mL) and different concentrations of ZnO NPs (a: 0.03; b: 0.06; c: 0.12; d: 0.25; f: 1.00 mg/mL).

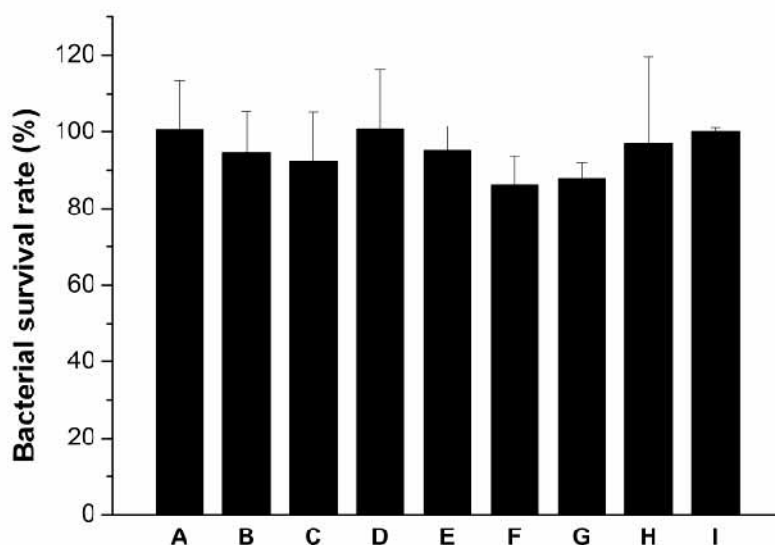

**Fig. S4:** The survival rate of *E. coli* incubated with different concentrations of ZnS synthesised without Fc-DDAB (A: 0.03; B: 0.06; C: 0.12; D: 0.25 mg/mL) and ZnS with only DDAB (E: 0.03; F: 0.06; G: 0.12; H: 0.25; I: 0 mg/mL). Sample I without ZnS was set as control group with bacterial survival rate 100%. Data were means of triplicate experiments  $\pm$  SD.
